# Supplementary material for: NextSV: a meta-caller for structural variants from low-coverage long-read sequencing data
Source: PubMed Central journal article supplement (PMC5966861; doi:10.1186/s12859-018-2207-1), 2018-05-23
Supplement: 12859_2018_2207_MOESM1_ESM.pdf [file 12859_2018_2207_MOESM1_ESM.pdf]

Table S1. Performance of BLASR/PBHoney-Spots on NA12878 genome (Deletion calls)

| Coverage | Replicate | No. of calls | No. of true positives | Recall | Precision | F1 score |
|----------|-----------|--------------|-----------------------|--------|-----------|----------|
| 2X       | 1         | 913          | 580                   | 0.277  | 0.635     | 0.386    |
| 2X       | 2         | 874          | 538                   | 0.257  | 0.616     | 0.363    |
| 2X       | 3         | 869          | 554                   | 0.265  | 0.638     | 0.374    |
| 2X       | 4         | 898          | 569                   | 0.272  | 0.634     | 0.380    |
| 2X       | 5         | 906          | 565                   | 0.270  | 0.624     | 0.377    |
| 4X       | 1         | 1816         | 1077                  | 0.514  | 0.593     | 0.551    |
| 4X       | 2         | 1805         | 1073                  | 0.512  | 0.594     | 0.550    |
| 4X       | 3         | 1857         | 1088                  | 0.520  | 0.586     | 0.551    |
| 4X       | 4         | 1800         | 1096                  | 0.523  | 0.609     | 0.563    |
| 4X       | 5         | 1780         | 1080                  | 0.516  | 0.607     | 0.558    |
| 6X       | 1         | 2352         | 1346                  | 0.643  | 0.572     | 0.605    |
| 6X       | 2         | 2368         | 1329                  | 0.635  | 0.561     | 0.596    |
| 6X       | 3         | 2427         | 1372                  | 0.655  | 0.565     | 0.607    |
| 6X       | 4         | 2386         | 1377                  | 0.658  | 0.577     | 0.615    |
| 6X       | 5         | 2403         | 1361                  | 0.650  | 0.566     | 0.605    |
| 8X       | 1         | 2716         | 1493                  | 0.713  | 0.550     | 0.621    |
| 8X       | 2         | 2704         | 1503                  | 0.718  | 0.556     | 0.627    |
| 8X       | 3         | 2779         | 1512                  | 0.722  | 0.544     | 0.621    |
| 8X       | 4         | 2729         | 1520                  | 0.726  | 0.557     | 0.630    |
| 8X       | 5         | 2766         | 1529                  | 0.730  | 0.553     | 0.629    |
| 10X      | 1         | 2965         | 1590                  | 0.759  | 0.536     | 0.629    |
| 10X      | 2         | 2941         | 1589                  | 0.759  | 0.540     | 0.631    |
| 10X      | 3         | 2999         | 1590                  | 0.759  | 0.530     | 0.624    |
| 10X      | 4         | 2943         | 1602                  | 0.765  | 0.544     | 0.636    |
| 10X      | 5         | 2995         | 1603                  | 0.766  | 0.535     | 0.630    |
| 12X      | 1         | 3144         | 1655                  | 0.790  | 0.526     | 0.632    |
| 12X      | 2         | 3099         | 1642                  | 0.784  | 0.530     | 0.632    |
| 12X      | 3         | 3136         | 1636                  | 0.781  | 0.522     | 0.626    |
| 12X      | 4         | 3096         | 1643                  | 0.785  | 0.531     | 0.633    |
| 12X      | 5         | 3134         | 1651                  | 0.788  | 0.527     | 0.632    |
| 15X      | 1         | 3257         | 1697                  | 0.810  | 0.521     | 0.634    |
| 15X      | 2         | 3235         | 1690                  | 0.807  | 0.522     | 0.634    |
| 15X      | 3         | 3267         | 1694                  | 0.809  | 0.519     | 0.632    |
| 15X      | 4         | 3230         | 1686                  | 0.805  | 0.522     | 0.633    |
| 15X      | 5         | 3247         | 1690                  | 0.807  | 0.520     | 0.633    |

Table S2. Performance of BLASR/PBHoney-Spots on NA12878 genome (Insertion calls)

| Coverage | Replicate | No. of calls | No. of true positives | Recall | Precision | F1 score |
|----------|-----------|--------------|-----------------------|--------|-----------|----------|
| 2X       | 1         | 1553         | 315                   | 0.283  | 0.203     | 0.236    |
| 2X       | 2         | 1517         | 301                   | 0.270  | 0.198     | 0.229    |
| 2X       | 3         | 1557         | 317                   | 0.285  | 0.204     | 0.237    |
| 2X       | 4         | 1542         | 308                   | 0.276  | 0.200     | 0.232    |
| 2X       | 5         | 1565         | 302                   | 0.271  | 0.193     | 0.225    |
| 4X       | 1         | 3638         | 611                   | 0.548  | 0.168     | 0.257    |
| 4X       | 2         | 3675         | 628                   | 0.564  | 0.171     | 0.262    |
| 4X       | 3         | 3555         | 628                   | 0.564  | 0.177     | 0.269    |
| 4X       | 4         | 3648         | 641                   | 0.575  | 0.176     | 0.269    |
| 4X       | 5         | 3630         | 643                   | 0.577  | 0.177     | 0.271    |
| 6X       | 1         | 5246         | 787                   | 0.706  | 0.150     | 0.247    |
| 6X       | 2         | 5224         | 789                   | 0.708  | 0.151     | 0.249    |
| 6X       | 3         | 5092         | 808                   | 0.725  | 0.159     | 0.260    |
| 6X       | 4         | 5150         | 788                   | 0.707  | 0.153     | 0.252    |
| 6X       | 5         | 5114         | 785                   | 0.705  | 0.154     | 0.252    |
| 8X       | 1         | 6148         | 868                   | 0.779  | 0.141     | 0.239    |
| 8X       | 2         | 6163         | 874                   | 0.785  | 0.142     | 0.240    |
| 8X       | 3         | 6053         | 886                   | 0.795  | 0.146     | 0.247    |
| 8X       | 4         | 6090         | 857                   | 0.769  | 0.141     | 0.238    |
| 8X       | 5         | 6071         | 865                   | 0.776  | 0.142     | 0.241    |
| 10X      | 1         | 6464         | 907                   | 0.814  | 0.140     | 0.239    |
| 10X      | 2         | 6509         | 906                   | 0.813  | 0.139     | 0.238    |
| 10X      | 3         | 6426         | 922                   | 0.828  | 0.143     | 0.245    |
| 10X      | 4         | 6492         | 896                   | 0.804  | 0.138     | 0.236    |
| 10X      | 5         | 6496         | 910                   | 0.817  | 0.140     | 0.239    |
| 12X      | 1         | 6609         | 924                   | 0.829  | 0.140     | 0.239    |
| 12X      | 2         | 6637         | 926                   | 0.831  | 0.140     | 0.239    |
| 12X      | 3         | 6634         | 939                   | 0.843  | 0.142     | 0.242    |
| 12X      | 4         | 6583         | 918                   | 0.824  | 0.139     | 0.239    |
| 12X      | 5         | 6617         | 926                   | 0.831  | 0.140     | 0.240    |
| 15X      | 1         | 6773         | 935                   | 0.839  | 0.138     | 0.237    |
| 15X      | 2         | 6808         | 932                   | 0.837  | 0.137     | 0.235    |
| 15X      | 3         | 6761         | 945                   | 0.848  | 0.140     | 0.240    |
| 15X      | 4         | 6758         | 933                   | 0.838  | 0.138     | 0.237    |
| 15X      | 5         | 6744         | 942                   | 0.846  | 0.140     | 0.240    |

Table S3. Performance of BLASR/PBHoney-Tails on NA12878 genome (Deletion calls)

| Coverage | Replicate | No. of calls | No. of true positives | Recall | Precision | F1 score |
|----------|-----------|--------------|-----------------------|--------|-----------|----------|
| 2X       | 1         | 170          | 102                   | 0.049  | 0.600     | 0.090    |
| 2X       | 2         | 168          | 104                   | 0.050  | 0.619     | 0.092    |
| 2X       | 3         | 192          | 104                   | 0.050  | 0.542     | 0.091    |
| 2X       | 4         | 170          | 95                    | 0.045  | 0.559     | 0.084    |
| 2X       | 5         | 189          | 116                   | 0.055  | 0.614     | 0.102    |
| 4X       | 1         | 439          | 246                   | 0.117  | 0.560     | 0.194    |
| 4X       | 2         | 426          | 234                   | 0.112  | 0.549     | 0.186    |
| 4X       | 3         | 463          | 251                   | 0.120  | 0.542     | 0.196    |
| 4X       | 4         | 455          | 258                   | 0.123  | 0.567     | 0.202    |
| 4X       | 5         | 421          | 247                   | 0.118  | 0.587     | 0.196    |
| 6X       | 1         | 665          | 355                   | 0.170  | 0.534     | 0.257    |
| 6X       | 2         | 685          | 356                   | 0.170  | 0.520     | 0.256    |
| 6X       | 3         | 717          | 382                   | 0.182  | 0.533     | 0.272    |
| 6X       | 4         | 693          | 364                   | 0.174  | 0.525     | 0.261    |
| 6X       | 5         | 547          | 279                   | 0.133  | 0.510     | 0.211    |
| 8X       | 1         | 935          | 464                   | 0.222  | 0.496     | 0.306    |
| 8X       | 2         | 921          | 446                   | 0.213  | 0.484     | 0.296    |
| 8X       | 3         | 985          | 505                   | 0.241  | 0.513     | 0.328    |
| 8X       | 4         | 934          | 460                   | 0.220  | 0.493     | 0.304    |
| 8X       | 5         | 927          | 461                   | 0.220  | 0.497     | 0.305    |
| 10X      | 1         | 1163         | 542                   | 0.259  | 0.466     | 0.333    |
| 10X      | 2         | 1161         | 541                   | 0.258  | 0.466     | 0.332    |
| 10X      | 3         | 1215         | 577                   | 0.276  | 0.475     | 0.349    |
| 10X      | 4         | 1158         | 546                   | 0.261  | 0.472     | 0.336    |
| 10X      | 5         | 1174         | 552                   | 0.264  | 0.470     | 0.338    |
| 12X      | 1         | 1408         | 613                   | 0.293  | 0.435     | 0.350    |
| 12X      | 2         | 1420         | 627                   | 0.299  | 0.442     | 0.357    |
| 12X      | 3         | 1443         | 641                   | 0.306  | 0.444     | 0.362    |
| 12X      | 4         | 918          | 383                   | 0.183  | 0.417     | 0.254    |
| 12X      | 5         | 1387         | 612                   | 0.292  | 0.441     | 0.352    |
| 15X      | 1         | 822          | 282                   | 0.135  | 0.343     | 0.193    |
| 15X      | 2         | 689          | 222                   | 0.106  | 0.322     | 0.160    |
| 15X      | 3         | 1751         | 713                   | 0.340  | 0.407     | 0.371    |
| 15X      | 4         | 1799         | 723                   | 0.345  | 0.402     | 0.371    |
| 15X      | 5         | 1038         | 379                   | 0.181  | 0.365     | 0.242    |

Table S4. Performance of BLASR/PBHoney-Tails on NA12878 genome (Insertion calls)

| Coverage | Replicate | No. of calls | No. of true positives | Recall | Precision | F1 score |
|----------|-----------|--------------|-----------------------|--------|-----------|----------|
| 2X       | 1         | 16           | 0                     | 0.000  | 0.000     | 0.000    |
| 2X       | 2         | 22           | 0                     | 0.000  | 0.000     | 0.000    |
| 2X       | 3         | 14           | 0                     | 0.000  | 0.000     | 0.000    |
| 2X       | 4         | 18           | 0                     | 0.000  | 0.000     | 0.000    |
| 2X       | 5         | 12           | 0                     | 0.000  | 0.000     | 0.000    |
| 4X       | 1         | 37           | 0                     | 0.000  | 0.000     | 0.000    |
| 4X       | 2         | 40           | 0                     | 0.000  | 0.000     | 0.000    |
| 4X       | 3         | 37           | 0                     | 0.000  | 0.000     | 0.000    |
| 4X       | 4         | 42           | 2                     | 0.002  | 0.048     | 0.003    |
| 4X       | 5         | 33           | 0                     | 0.000  | 0.000     | 0.000    |
| 6X       | 1         | 72           | 1                     | 0.001  | 0.014     | 0.002    |
| 6X       | 2         | 75           | 0                     | 0.000  | 0.000     | 0.000    |
| 6X       | 3         | 73           | 0                     | 0.000  | 0.000     | 0.000    |
| 6X       | 4         | 76           | 2                     | 0.002  | 0.026     | 0.003    |
| 6X       | 5         | 44           | 0                     | 0.000  | 0.000     | 0.000    |
| 8X       | 1         | 119          | 2                     | 0.002  | 0.017     | 0.003    |
| 8X       | 2         | 111          | 0                     | 0.000  | 0.000     | 0.000    |
| 8X       | 3         | 102          | 1                     | 0.001  | 0.010     | 0.002    |
| 8X       | 4         | 112          | 2                     | 0.002  | 0.018     | 0.003    |
| 8X       | 5         | 94           | 1                     | 0.001  | 0.011     | 0.002    |
| 10X      | 1         | 159          | 3                     | 0.003  | 0.019     | 0.005    |
| 10X      | 2         | 146          | 1                     | 0.001  | 0.007     | 0.002    |
| 10X      | 3         | 144          | 1                     | 0.001  | 0.007     | 0.002    |
| 10X      | 4         | 147          | 2                     | 0.002  | 0.014     | 0.003    |
| 10X      | 5         | 134          | 1                     | 0.001  | 0.007     | 0.002    |
| 12X      | 1         | 188          | 3                     | 0.003  | 0.016     | 0.005    |
| 12X      | 2         | 177          | 2                     | 0.002  | 0.011     | 0.003    |
| 12X      | 3         | 178          | 1                     | 0.001  | 0.006     | 0.002    |
| 12X      | 4         | 129          | 2                     | 0.002  | 0.016     | 0.003    |
| 12X      | 5         | 174          | 2                     | 0.002  | 0.011     | 0.003    |
| 15X      | 1         | 132          | 1                     | 0.001  | 0.008     | 0.002    |
| 15X      | 2         | 101          | 0                     | 0.000  | 0.000     | 0.000    |
| 15X      | 3         | 224          | 2                     | 0.002  | 0.009     | 0.003    |
| 15X      | 4         | 230          | 2                     | 0.002  | 0.009     | 0.003    |
| 15X      | 5         | 168          | 1                     | 0.001  | 0.006     | 0.002    |

Table S5. Performance of BWA/Sniffles on NA12878 genome (Deletion calls)

| Coverage | Replicate | No. of calls | No. of true positives | Recall | Precision | F1 score |
|----------|-----------|--------------|-----------------------|--------|-----------|----------|
| 2X       | 1         | 558          | 462                   | 0.221  | 0.828     | 0.348    |
| 2X       | 2         | 550          | 462                   | 0.221  | 0.840     | 0.349    |
| 2X       | 3         | 551          | 454                   | 0.217  | 0.824     | 0.343    |
| 2X       | 4         | 561          | 467                   | 0.223  | 0.832     | 0.352    |
| 2X       | 5         | 560          | 468                   | 0.223  | 0.836     | 0.353    |
| 4X       | 1         | 1188         | 970                   | 0.463  | 0.816     | 0.591    |
| 4X       | 2         | 1167         | 952                   | 0.455  | 0.816     | 0.584    |
| 4X       | 3         | 1214         | 979                   | 0.468  | 0.806     | 0.592    |
| 4X       | 4         | 1195         | 978                   | 0.467  | 0.818     | 0.595    |
| 4X       | 5         | 1204         | 976                   | 0.466  | 0.811     | 0.592    |
| 6X       | 1         | 1546         | 1225                  | 0.585  | 0.792     | 0.673    |
| 6X       | 2         | 1587         | 1247                  | 0.596  | 0.786     | 0.678    |
| 6X       | 3         | 1578         | 1241                  | 0.593  | 0.786     | 0.676    |
| 6X       | 4         | 1553         | 1229                  | 0.587  | 0.791     | 0.674    |
| 6X       | 5         | 1595         | 1253                  | 0.598  | 0.786     | 0.679    |
| 8X       | 1         | 1814         | 1392                  | 0.665  | 0.767     | 0.712    |
| 8X       | 2         | 1843         | 1428                  | 0.682  | 0.775     | 0.725    |
| 8X       | 3         | 1835         | 1416                  | 0.676  | 0.772     | 0.721    |
| 8X       | 4         | 1828         | 1405                  | 0.671  | 0.769     | 0.716    |
| 8X       | 5         | 1856         | 1421                  | 0.679  | 0.766     | 0.719    |
| 10X      | 1         | 2004         | 1498                  | 0.715  | 0.748     | 0.731    |
| 10X      | 2         | 2035         | 1528                  | 0.730  | 0.751     | 0.740    |
| 10X      | 3         | 2024         | 1518                  | 0.725  | 0.750     | 0.737    |
| 10X      | 4         | 2040         | 1527                  | 0.729  | 0.749     | 0.739    |
| 10X      | 5         | 2028         | 1526                  | 0.729  | 0.752     | 0.740    |
| 12X      | 1         | 2167         | 1574                  | 0.752  | 0.726     | 0.739    |
| 12X      | 2         | 2167         | 1590                  | 0.759  | 0.734     | 0.746    |
| 12X      | 3         | 2173         | 1600                  | 0.764  | 0.736     | 0.750    |
| 12X      | 4         | 2160         | 1585                  | 0.757  | 0.734     | 0.745    |
| 12X      | 5         | 2165         | 1595                  | 0.762  | 0.737     | 0.749    |
| 15X      | 1         | 2364         | 1664                  | 0.795  | 0.704     | 0.747    |
| 15X      | 2         | 2355         | 1673                  | 0.799  | 0.710     | 0.752    |
| 15X      | 3         | 2338         | 1655                  | 0.790  | 0.708     | 0.747    |
| 15X      | 4         | 2360         | 1677                  | 0.801  | 0.711     | 0.753    |
| 15X      | 5         | 2350         | 1658                  | 0.792  | 0.706     | 0.746    |

Table S6. Performance of BWA/Sniffles on NA12878 genome (Insertion calls)

| Coverage | Replicate | No. of calls | No. of true positives | Recall | Precision | F1 score |
|----------|-----------|--------------|-----------------------|--------|-----------|----------|
| 2X       | 1         | 784          | 106                   | 0.095  | 0.135     | 0.112    |
| 2X       | 2         | 792          | 100                   | 0.090  | 0.126     | 0.105    |
| 2X       | 3         | 840          | 105                   | 0.094  | 0.125     | 0.107    |
| 2X       | 4         | 793          | 93                    | 0.083  | 0.117     | 0.098    |
| 2X       | 5         | 761          | 96                    | 0.086  | 0.126     | 0.102    |
| 4X       | 1         | 2944         | 274                   | 0.246  | 0.093     | 0.135    |
| 4X       | 2         | 2891         | 261                   | 0.234  | 0.090     | 0.130    |
| 4X       | 3         | 2879         | 246                   | 0.221  | 0.085     | 0.123    |
| 4X       | 4         | 2941         | 265                   | 0.238  | 0.090     | 0.131    |
| 4X       | 5         | 3013         | 263                   | 0.236  | 0.087     | 0.127    |
| 6X       | 1         | 5996         | 400                   | 0.359  | 0.067     | 0.113    |
| 6X       | 2         | 6077         | 381                   | 0.342  | 0.063     | 0.106    |
| 6X       | 3         | 5998         | 381                   | 0.342  | 0.064     | 0.107    |
| 6X       | 4         | 6127         | 390                   | 0.350  | 0.064     | 0.108    |
| 6X       | 5         | 6201         | 394                   | 0.354  | 0.064     | 0.108    |
| 8X       | 1         | 10201        | 493                   | 0.443  | 0.048     | 0.087    |
| 8X       | 2         | 10180        | 495                   | 0.444  | 0.049     | 0.088    |
| 8X       | 3         | 10136        | 477                   | 0.428  | 0.047     | 0.085    |
| 8X       | 4         | 10298        | 491                   | 0.441  | 0.048     | 0.086    |
| 8X       | 5         | 10432        | 495                   | 0.444  | 0.047     | 0.086    |
| 10X      | 1         | 15330        | 567                   | 0.509  | 0.037     | 0.069    |
| 10X      | 2         | 15309        | 575                   | 0.516  | 0.038     | 0.070    |
| 10X      | 3         | 15282        | 563                   | 0.505  | 0.037     | 0.069    |
| 10X      | 4         | 15543        | 564                   | 0.506  | 0.036     | 0.068    |
| 10X      | 5         | 15516        | 561                   | 0.504  | 0.036     | 0.067    |
| 12X      | 1         | 21427        | 620                   | 0.557  | 0.029     | 0.055    |
| 12X      | 2         | 21317        | 629                   | 0.565  | 0.030     | 0.056    |
| 12X      | 3         | 21400        | 618                   | 0.555  | 0.029     | 0.055    |
| 12X      | 4         | 21439        | 633                   | 0.568  | 0.030     | 0.056    |
| 12X      | 5         | 21396        | 625                   | 0.561  | 0.029     | 0.056    |
| 15X      | 1         | 32350        | 697                   | 0.626  | 0.022     | 0.042    |
| 15X      | 2         | 32241        | 686                   | 0.616  | 0.021     | 0.041    |
| 15X      | 3         | 32131        | 693                   | 0.622  | 0.022     | 0.042    |
| 15X      | 4         | 32267        | 697                   | 0.626  | 0.022     | 0.042    |
| 15X      | 5         | 32247        | 693                   | 0.622  | 0.021     | 0.042    |

Table S7. Performance of NGMLR/Sniffles on NA12878 genome (Deletion calls)

| Coverage | Replicate | No. of calls | No. of true positives | Recall | Precision | F1 score |
|----------|-----------|--------------|-----------------------|--------|-----------|----------|
| 2X       | 1         | 1039         | 692                   | 0.330  | 0.666     | 0.442    |
| 2X       | 2         | 953          | 640                   | 0.306  | 0.672     | 0.420    |
| 2X       | 3         | 1011         | 686                   | 0.328  | 0.679     | 0.442    |
| 2X       | 4         | 995          | 672                   | 0.321  | 0.675     | 0.435    |
| 2X       | 5         | 1013         | 689                   | 0.329  | 0.680     | 0.444    |
| 4X       | 1         | 2064         | 1324                  | 0.632  | 0.641     | 0.637    |
| 4X       | 2         | 2010         | 1308                  | 0.625  | 0.651     | 0.637    |
| 4X       | 3         | 2018         | 1295                  | 0.618  | 0.642     | 0.630    |
| 4X       | 4         | 2036         | 1315                  | 0.628  | 0.646     | 0.637    |
| 4X       | 5         | 2048         | 1304                  | 0.623  | 0.637     | 0.630    |
| 6X       | 1         | 2637         | 1624                  | 0.776  | 0.616     | 0.687    |
| 6X       | 2         | 2603         | 1615                  | 0.771  | 0.620     | 0.688    |
| 6X       | 3         | 2673         | 1638                  | 0.782  | 0.613     | 0.687    |
| 6X       | 4         | 2646         | 1624                  | 0.776  | 0.614     | 0.685    |
| 6X       | 5         | 2675         | 1638                  | 0.782  | 0.612     | 0.687    |
| 8X       | 1         | 3080         | 1800                  | 0.860  | 0.584     | 0.696    |
| 8X       | 2         | 3025         | 1813                  | 0.866  | 0.599     | 0.708    |
| 8X       | 3         | 3080         | 1830                  | 0.874  | 0.594     | 0.707    |
| 8X       | 4         | 3080         | 1821                  | 0.870  | 0.591     | 0.704    |
| 8X       | 5         | 3085         | 1825                  | 0.872  | 0.592     | 0.705    |
| 10X      | 1         | 3344         | 1894                  | 0.904  | 0.566     | 0.697    |
| 10X      | 2         | 3327         | 1909                  | 0.912  | 0.574     | 0.704    |
| 10X      | 3         | 3358         | 1904                  | 0.909  | 0.567     | 0.698    |
| 10X      | 4         | 3368         | 1922                  | 0.918  | 0.571     | 0.704    |
| 10X      | 5         | 3333         | 1907                  | 0.911  | 0.572     | 0.703    |
| 12X      | 1         | 3552         | 1953                  | 0.933  | 0.550     | 0.692    |
| 12X      | 2         | 3562         | 1960                  | 0.936  | 0.550     | 0.693    |
| 12X      | 3         | 3553         | 1957                  | 0.935  | 0.551     | 0.693    |
| 12X      | 4         | 3583         | 1973                  | 0.942  | 0.551     | 0.695    |
| 12X      | 5         | 3573         | 1965                  | 0.938  | 0.550     | 0.693    |
| 15X      | 1         | 3814         | 2013                  | 0.961  | 0.528     | 0.681    |
| 15X      | 2         | 3819         | 2011                  | 0.960  | 0.527     | 0.680    |
| 15X      | 3         | 3829         | 2004                  | 0.957  | 0.523     | 0.677    |
| 15X      | 4         | 3829         | 2012                  | 0.961  | 0.525     | 0.679    |
| 15X      | 5         | 3836         | 2007                  | 0.958  | 0.523     | 0.677    |

Table S8. Performance of NGMLR/Sniffles on NA12878 genome (Insertion calls)

| Coverage | Replicate | No. of calls | No. of true positives | Recall | Precision | F1 score |
|----------|-----------|--------------|-----------------------|--------|-----------|----------|
| 2X       | 1         | 1236         | 265                   | 0.238  | 0.214     | 0.226    |
| 2X       | 2         | 1126         | 245                   | 0.220  | 0.218     | 0.219    |
| 2X       | 3         | 1231         | 273                   | 0.245  | 0.222     | 0.233    |
| 2X       | 4         | 1200         | 258                   | 0.232  | 0.215     | 0.223    |
| 2X       | 5         | 1187         | 271                   | 0.243  | 0.228     | 0.236    |
| 4X       | 1         | 3142         | 561                   | 0.504  | 0.179     | 0.264    |
| 4X       | 2         | 3145         | 573                   | 0.514  | 0.182     | 0.269    |
| 4X       | 3         | 3117         | 565                   | 0.507  | 0.181     | 0.267    |
| 4X       | 4         | 3140         | 590                   | 0.530  | 0.188     | 0.277    |
| 4X       | 5         | 3071         | 580                   | 0.521  | 0.189     | 0.277    |
| 6X       | 1         | 5076         | 724                   | 0.650  | 0.143     | 0.234    |
| 6X       | 2         | 5094         | 720                   | 0.646  | 0.141     | 0.232    |
| 6X       | 3         | 5060         | 726                   | 0.652  | 0.143     | 0.235    |
| 6X       | 4         | 5049         | 722                   | 0.648  | 0.143     | 0.234    |
| 6X       | 5         | 4921         | 726                   | 0.652  | 0.148     | 0.241    |
| 8X       | 1         | 7113         | 800                   | 0.718  | 0.112     | 0.194    |
| 8X       | 2         | 7124         | 819                   | 0.735  | 0.115     | 0.199    |
| 8X       | 3         | 7118         | 802                   | 0.720  | 0.113     | 0.195    |
| 8X       | 4         | 7026         | 780                   | 0.700  | 0.111     | 0.192    |
| 8X       | 5         | 7001         | 809                   | 0.726  | 0.116     | 0.199    |
| 10X      | 1         | 9278         | 848                   | 0.761  | 0.091     | 0.163    |
| 10X      | 2         | 9340         | 844                   | 0.758  | 0.090     | 0.161    |
| 10X      | 3         | 9254         | 865                   | 0.776  | 0.093     | 0.167    |
| 10X      | 4         | 9131         | 837                   | 0.751  | 0.092     | 0.163    |
| 10X      | 5         | 9229         | 860                   | 0.772  | 0.093     | 0.166    |
| 12X      | 1         | 11616        | 878                   | 0.788  | 0.076     | 0.138    |
| 12X      | 2         | 11719        | 867                   | 0.778  | 0.074     | 0.135    |
| 12X      | 3         | 11692        | 902                   | 0.810  | 0.077     | 0.141    |
| 12X      | 4         | 11520        | 866                   | 0.777  | 0.075     | 0.137    |
| 12X      | 5         | 11583        | 882                   | 0.792  | 0.076     | 0.139    |
| 15X      | 1         | 15515        | 909                   | 0.816  | 0.059     | 0.109    |
| 15X      | 2         | 15433        | 891                   | 0.800  | 0.058     | 0.108    |
| 15X      | 3         | 15366        | 923                   | 0.829  | 0.060     | 0.112    |
| 15X      | 4         | 15331        | 912                   | 0.819  | 0.059     | 0.111    |
| 15X      | 5         | 15399        | 915                   | 0.821  | 0.059     | 0.111    |



Table S9. Performance of NextSV sensitive call set on NA12878 genome (Deletion calls)

| Coverage | Replicate | No. of calls | No. of true positives | Recall | Precision | F1 score |
|----------|-----------|--------------|-----------------------|--------|-----------|----------|
| 2X       | 1         | 1434         | 820                   | 0.392  | 0.572     | 0.465    |
| 2X       | 2         | 1342         | 762                   | 0.364  | 0.568     | 0.444    |
| 2X       | 3         | 1373         | 793                   | 0.379  | 0.578     | 0.457    |
| 2X       | 4         | 1363         | 790                   | 0.377  | 0.580     | 0.457    |
| 2X       | 5         | 1408         | 818                   | 0.391  | 0.581     | 0.467    |
| 4X       | 1         | 2756         | 1454                  | 0.694  | 0.528     | 0.600    |
| 4X       | 2         | 2713         | 1444                  | 0.690  | 0.532     | 0.601    |
| 4X       | 3         | 2777         | 1447                  | 0.691  | 0.521     | 0.594    |
| 4X       | 4         | 2743         | 1468                  | 0.701  | 0.535     | 0.607    |
| 4X       | 5         | 2685         | 1421                  | 0.679  | 0.529     | 0.595    |
| 6X       | 1         | 3550         | 1741                  | 0.831  | 0.490     | 0.617    |
| 6X       | 2         | 3564         | 1731                  | 0.827  | 0.486     | 0.612    |
| 6X       | 3         | 3643         | 1782                  | 0.851  | 0.489     | 0.621    |
| 6X       | 4         | 3590         | 1765                  | 0.843  | 0.492     | 0.621    |
| 6X       | 5         | 3546         | 1738                  | 0.830  | 0.490     | 0.616    |
| 8X       | 1         | 4195         | 1892                  | 0.904  | 0.451     | 0.602    |
| 8X       | 2         | 4128         | 1908                  | 0.911  | 0.462     | 0.613    |
| 8X       | 3         | 4257         | 1933                  | 0.923  | 0.454     | 0.609    |
| 8X       | 4         | 4190         | 1923                  | 0.918  | 0.459     | 0.612    |
| 8X       | 5         | 4175         | 1907                  | 0.911  | 0.457     | 0.608    |
| 10X      | 1         | 4640         | 1975                  | 0.943  | 0.426     | 0.587    |
| 10X      | 2         | 4596         | 1988                  | 0.949  | 0.433     | 0.594    |
| 10X      | 3         | 4689         | 1977                  | 0.944  | 0.422     | 0.583    |
| 10X      | 4         | 4622         | 1998                  | 0.954  | 0.432     | 0.595    |
| 10X      | 5         | 4626         | 1972                  | 0.942  | 0.426     | 0.587    |
| 12X      | 1         | 5034         | 2022                  | 0.966  | 0.402     | 0.567    |
| 12X      | 2         | 4998         | 2029                  | 0.969  | 0.406     | 0.572    |
| 12X      | 3         | 5048         | 2021                  | 0.965  | 0.400     | 0.566    |
| 12X      | 4         | 4876         | 2030                  | 0.969  | 0.416     | 0.582    |
| 12X      | 5         | 5043         | 2026                  | 0.968  | 0.402     | 0.568    |
| 15X      | 1         | 5198         | 2057                  | 0.982  | 0.396     | 0.564    |
| 15X      | 2         | 5117         | 2053                  | 0.980  | 0.401     | 0.569    |
| 15X      | 3         | 5549         | 2064                  | 0.986  | 0.372     | 0.540    |
| 15X      | 4         | 5547         | 2070                  | 0.989  | 0.373     | 0.542    |
| 15X      | 5         | 5277         | 2056                  | 0.982  | 0.390     | 0.558    |

Table S10. Performance of NextSV sensitive call set on NA12878 genome (Insertion calls)

| Coverage | Replicate | No. of calls | No. of true positives | Recall | Precision | F1 score |
|----------|-----------|--------------|-----------------------|--------|-----------|----------|
| 2X       | 1         | 2140         | 333                   | 0.299  | 0.156     | 0.205    |
| 2X       | 2         | 2043         | 321                   | 0.288  | 0.157     | 0.203    |
| 2X       | 3         | 2125         | 346                   | 0.311  | 0.163     | 0.214    |
| 2X       | 4         | 2099         | 329                   | 0.295  | 0.157     | 0.205    |
| 2X       | 5         | 2107         | 333                   | 0.299  | 0.158     | 0.207    |
| 4X       | 1         | 5247         | 657                   | 0.590  | 0.125     | 0.207    |
| 4X       | 2         | 5283         | 677                   | 0.608  | 0.128     | 0.212    |
| 4X       | 3         | 5172         | 666                   | 0.598  | 0.129     | 0.212    |
| 4X       | 4         | 5244         | 686                   | 0.616  | 0.131     | 0.216    |
| 4X       | 5         | 5148         | 683                   | 0.613  | 0.133     | 0.218    |
| 6X       | 1         | 8203         | 836                   | 0.750  | 0.102     | 0.179    |
| 6X       | 2         | 8193         | 837                   | 0.751  | 0.102     | 0.180    |
| 6X       | 3         | 8076         | 848                   | 0.761  | 0.105     | 0.185    |
| 6X       | 4         | 8108         | 839                   | 0.753  | 0.103     | 0.182    |
| 6X       | 5         | 7934         | 836                   | 0.750  | 0.105     | 0.185    |
| 8X       | 1         | 10821        | 926                   | 0.831  | 0.086     | 0.155    |
| 8X       | 2         | 10830        | 937                   | 0.841  | 0.087     | 0.157    |
| 8X       | 3         | 10759        | 932                   | 0.837  | 0.087     | 0.157    |
| 8X       | 4         | 10735        | 918                   | 0.824  | 0.086     | 0.155    |
| 8X       | 5         | 10646        | 921                   | 0.827  | 0.087     | 0.157    |
| 10X      | 1         | 13131        | 973                   | 0.873  | 0.074     | 0.137    |
| 10X      | 2         | 13226        | 977                   | 0.877  | 0.074     | 0.136    |
| 10X      | 3         | 13061        | 987                   | 0.886  | 0.076     | 0.139    |
| 10X      | 4         | 13096        | 975                   | 0.875  | 0.074     | 0.137    |
| 10X      | 5         | 13100        | 976                   | 0.876  | 0.075     | 0.137    |
| 12X      | 1         | 15501        | 1003                  | 0.900  | 0.065     | 0.121    |
| 12X      | 2         | 15634        | 1012                  | 0.908  | 0.065     | 0.121    |
| 12X      | 3         | 15580        | 1015                  | 0.911  | 0.065     | 0.122    |
| 12X      | 4         | 15433        | 1000                  | 0.898  | 0.065     | 0.121    |
| 12X      | 5         | 15467        | 1000                  | 0.898  | 0.065     | 0.121    |
| 15X      | 1         | 19396        | 1023                  | 0.918  | 0.053     | 0.100    |
| 15X      | 2         | 19385        | 1023                  | 0.918  | 0.053     | 0.100    |
| 15X      | 3         | 19311        | 1034                  | 0.928  | 0.054     | 0.101    |
| 15X      | 4         | 19271        | 1025                  | 0.920  | 0.053     | 0.101    |
| 15X      | 5         | 19306        | 1026                  | 0.921  | 0.053     | 0.100    |

Table S11. Performance of NextSV stringent call set on NA12878 genome (Deletion calls)

| Coverage | Replicate | No. of calls | No. of true positives | Recall | Precision | F1 score |
|----------|-----------|--------------|-----------------------|--------|-----------|----------|
| 2X       | 1         | 670          | 537                   | 0.256  | 0.801     | 0.389    |
| 2X       | 2         | 640          | 509                   | 0.243  | 0.795     | 0.372    |
| 2X       | 3         | 686          | 541                   | 0.258  | 0.789     | 0.389    |
| 2X       | 4         | 692          | 540                   | 0.258  | 0.780     | 0.388    |
| 2X       | 5         | 687          | 543                   | 0.259  | 0.790     | 0.391    |
| 4X       | 1         | 1504         | 1142                  | 0.545  | 0.759     | 0.635    |
| 4X       | 2         | 1455         | 1116                  | 0.533  | 0.767     | 0.629    |
| 4X       | 3         | 1478         | 1128                  | 0.539  | 0.763     | 0.632    |
| 4X       | 4         | 1464         | 1137                  | 0.543  | 0.777     | 0.639    |
| 4X       | 5         | 1491         | 1142                  | 0.545  | 0.766     | 0.637    |
| 6X       | 1         | 1938         | 1452                  | 0.693  | 0.749     | 0.720    |
| 6X       | 2         | 1916         | 1432                  | 0.684  | 0.747     | 0.714    |
| 6X       | 3         | 1991         | 1468                  | 0.701  | 0.737     | 0.719    |
| 6X       | 4         | 1949         | 1454                  | 0.694  | 0.746     | 0.719    |
| 6X       | 5         | 1943         | 1437                  | 0.686  | 0.740     | 0.712    |
| 8X       | 1         | 2253         | 1645                  | 0.786  | 0.730     | 0.757    |
| 8X       | 2         | 2253         | 1657                  | 0.791  | 0.735     | 0.762    |
| 8X       | 3         | 2278         | 1673                  | 0.799  | 0.734     | 0.765    |
| 8X       | 4         | 2273         | 1662                  | 0.794  | 0.731     | 0.761    |
| 8X       | 5         | 2302         | 1674                  | 0.799  | 0.727     | 0.762    |
| 10X      | 1         | 2439         | 1750                  | 0.836  | 0.718     | 0.772    |
| 10X      | 2         | 2452         | 1768                  | 0.844  | 0.721     | 0.778    |
| 10X      | 3         | 2463         | 1767                  | 0.844  | 0.717     | 0.776    |
| 10X      | 4         | 2459         | 1776                  | 0.848  | 0.722     | 0.780    |
| 10X      | 5         | 2459         | 1759                  | 0.840  | 0.715     | 0.773    |
| 12X      | 1         | 2570         | 1819                  | 0.869  | 0.708     | 0.780    |
| 12X      | 2         | 2577         | 1818                  | 0.868  | 0.705     | 0.778    |
| 12X      | 3         | 2572         | 1823                  | 0.871  | 0.709     | 0.781    |
| 12X      | 4         | 2423         | 1742                  | 0.832  | 0.719     | 0.771    |
| 12X      | 5         | 2551         | 1818                  | 0.868  | 0.713     | 0.783    |
| 15X      | 1         | 2428         | 1746                  | 0.834  | 0.719     | 0.772    |
| 15X      | 2         | 2416         | 1722                  | 0.822  | 0.713     | 0.764    |
| 15X      | 3         | 2664         | 1874                  | 0.895  | 0.703     | 0.788    |
| 15X      | 4         | 2671         | 1876                  | 0.896  | 0.702     | 0.787    |
| 15X      | 5         | 2498         | 1768                  | 0.844  | 0.708     | 0.770    |

Table S12. Performance of NextSV stringent call set on NA12878 genome (Insertion calls)

| Coverage | Replicate | No. of calls | No. of true positives | Recall | Precision | F1 score |
|----------|-----------|--------------|-----------------------|--------|-----------|----------|
| 2X       | 1         | 665          | 247                   | 0.222  | 0.371     | 0.278    |
| 2X       | 2         | 616          | 225                   | 0.202  | 0.365     | 0.260    |
| 2X       | 3         | 674          | 244                   | 0.219  | 0.362     | 0.273    |
| 2X       | 4         | 657          | 237                   | 0.213  | 0.361     | 0.268    |
| 2X       | 5         | 656          | 240                   | 0.215  | 0.366     | 0.271    |
| 4X       | 1         | 1558         | 515                   | 0.462  | 0.331     | 0.385    |
| 4X       | 2         | 1569         | 524                   | 0.470  | 0.334     | 0.391    |
| 4X       | 3         | 1528         | 527                   | 0.473  | 0.345     | 0.399    |
| 4X       | 4         | 1571         | 546                   | 0.490  | 0.348     | 0.407    |
| 4X       | 5         | 1577         | 540                   | 0.485  | 0.342     | 0.401    |
| 6X       | 1         | 2166         | 675                   | 0.606  | 0.312     | 0.412    |
| 6X       | 2         | 2172         | 672                   | 0.603  | 0.309     | 0.409    |
| 6X       | 3         | 2120         | 686                   | 0.616  | 0.324     | 0.424    |
| 6X       | 4         | 2138         | 672                   | 0.603  | 0.314     | 0.413    |
| 6X       | 5         | 2130         | 675                   | 0.606  | 0.317     | 0.416    |
| 8X       | 1         | 2508         | 743                   | 0.667  | 0.296     | 0.410    |
| 8X       | 2         | 2526         | 756                   | 0.679  | 0.299     | 0.415    |
| 8X       | 3         | 2473         | 756                   | 0.679  | 0.306     | 0.422    |
| 8X       | 4         | 2450         | 721                   | 0.647  | 0.294     | 0.405    |
| 8X       | 5         | 2483         | 753                   | 0.676  | 0.303     | 0.419    |
| 10X      | 1         | 2698         | 783                   | 0.703  | 0.290     | 0.411    |
| 10X      | 2         | 2710         | 774                   | 0.695  | 0.286     | 0.405    |
| 10X      | 3         | 2699         | 800                   | 0.718  | 0.296     | 0.420    |
| 10X      | 4         | 2614         | 760                   | 0.682  | 0.291     | 0.408    |
| 10X      | 5         | 2699         | 794                   | 0.713  | 0.294     | 0.416    |
| 12X      | 1         | 2833         | 800                   | 0.718  | 0.282     | 0.405    |
| 12X      | 2         | 2824         | 783                   | 0.703  | 0.277     | 0.398    |
| 12X      | 3         | 2849         | 825                   | 0.741  | 0.290     | 0.416    |
| 12X      | 4         | 2754         | 786                   | 0.706  | 0.285     | 0.406    |
| 12X      | 5         | 2829         | 808                   | 0.725  | 0.286     | 0.410    |
| 15X      | 1         | 2972         | 822                   | 0.738  | 0.277     | 0.402    |
| 15X      | 2         | 2918         | 801                   | 0.719  | 0.275     | 0.397    |
| 15X      | 3         | 2953         | 834                   | 0.749  | 0.282     | 0.410    |
| 15X      | 4         | 2965         | 822                   | 0.738  | 0.277     | 0.403    |
| 15X      | 5         | 2942         | 833                   | 0.748  | 0.283     | 0.411    |

Table S13. Performance of BLASR/PBHoney-Spots on HX1 genome (Deletion calls)

| Coverage | Replicate | No. of calls | No. of true positives | Recall | Precision | F1 score |
|----------|-----------|--------------|-----------------------|--------|-----------|----------|
| 6X       | 1         | 2956         | 1669                  | 0.699  | 0.565     | 0.625    |
| 6X       | 2         | 3021         | 1694                  | 0.710  | 0.561     | 0.626    |
| 6X       | 3         | 2961         | 1668                  | 0.699  | 0.563     | 0.624    |
| 6X       | 4         | 2990         | 1672                  | 0.700  | 0.559     | 0.622    |
| 6X       | 5         | 2962         | 1672                  | 0.700  | 0.564     | 0.625    |
| 10X      | 1         | 3747         | 1908                  | 0.799  | 0.509     | 0.622    |
| 10X      | 2         | 3733         | 1893                  | 0.793  | 0.507     | 0.619    |
| 10X      | 3         | 3729         | 1890                  | 0.792  | 0.507     | 0.618    |
| 10X      | 4         | 3717         | 1886                  | 0.790  | 0.507     | 0.618    |
| 10X      | 5         | 3781         | 1890                  | 0.792  | 0.500     | 0.613    |
| 15X      | 1         | 4167         | 1958                  | 0.820  | 0.470     | 0.597    |
| 15X      | 2         | 4172         | 1979                  | 0.829  | 0.474     | 0.603    |
| 15X      | 3         | 4164         | 1970                  | 0.825  | 0.473     | 0.601    |
| 15X      | 4         | 4205         | 1971                  | 0.826  | 0.469     | 0.598    |
| 15X      | 5         | 4137         | 1964                  | 0.823  | 0.475     | 0.602    |

Table S14. Performance of BLASR/PBHoney-Spots on HX1 genome (Insertion calls)

| Coverage | Replicate | No. of calls | No. of true positives | Recall | Precision | F1 score |
|----------|-----------|--------------|-----------------------|--------|-----------|----------|
| 6X       | 1         | 4877         | 2091                  | 0.712  | 0.429     | 0.535    |
| 6X       | 2         | 4781         | 2140                  | 0.729  | 0.448     | 0.555    |
| 6X       | 3         | 4848         | 2129                  | 0.725  | 0.439     | 0.547    |
| 6X       | 4         | 4753         | 2106                  | 0.717  | 0.443     | 0.548    |
| 6X       | 5         | 4814         | 2075                  | 0.707  | 0.431     | 0.535    |
| 10X      | 1         | 5998         | 2383                  | 0.811  | 0.397     | 0.533    |
| 10X      | 2         | 6028         | 2405                  | 0.819  | 0.399     | 0.537    |
| 10X      | 3         | 5975         | 2397                  | 0.816  | 0.401     | 0.538    |
| 10X      | 4         | 6020         | 2399                  | 0.817  | 0.399     | 0.536    |
| 10X      | 5         | 6003         | 2386                  | 0.812  | 0.397     | 0.534    |
| 15X      | 1         | 6244         | 2419                  | 0.824  | 0.387     | 0.527    |
| 15X      | 2         | 6229         | 2412                  | 0.821  | 0.387     | 0.526    |
| 15X      | 3         | 6217         | 2415                  | 0.822  | 0.388     | 0.528    |
| 15X      | 4         | 6215         | 2402                  | 0.818  | 0.386     | 0.525    |
| 15X      | 5         | 6311         | 2404                  | 0.819  | 0.381     | 0.520    |

Table S15. Performance of BLASR/PBHoney-Tails on HX1 genome (Deletion calls)

| Coverage | Replicate | No. of calls | No. of true positives | Recall | Precision | F1 score |
|----------|-----------|--------------|-----------------------|--------|-----------|----------|
| 6X       | 1         | 419          | 265                   | 0.111  | 0.632     | 0.189    |
| 6X       | 2         | 434          | 293                   | 0.123  | 0.675     | 0.208    |
| 6X       | 3         | 438          | 281                   | 0.118  | 0.642     | 0.199    |
| 6X       | 4         | 462          | 285                   | 0.119  | 0.617     | 0.200    |
| 6X       | 5         | 449          | 289                   | 0.121  | 0.644     | 0.204    |
| 10X      | 1         | 748          | 422                   | 0.177  | 0.564     | 0.269    |
| 10X      | 2         | 768          | 457                   | 0.191  | 0.595     | 0.290    |
| 10X      | 3         | 730          | 438                   | 0.183  | 0.600     | 0.281    |
| 10X      | 4         | 757          | 450                   | 0.189  | 0.594     | 0.286    |
| 10X      | 5         | 749          | 443                   | 0.186  | 0.591     | 0.283    |
| 15X      | 1         | 1126         | 595                   | 0.249  | 0.528     | 0.339    |
| 15X      | 2         | 1079         | 595                   | 0.249  | 0.551     | 0.343    |
| 15X      | 3         | 1093         | 599                   | 0.251  | 0.548     | 0.344    |
| 15X      | 4         | 1050         | 577                   | 0.242  | 0.550     | 0.336    |
| 15X      | 5         | 1091         | 598                   | 0.251  | 0.548     | 0.344    |

Table S16. Performance of BLASR/PBHoney-Tails on HX1 genome (Insertion calls)

| Coverage | Replicate | No. of calls | No. of true positives | Recall | Precision | F1 score |
|----------|-----------|--------------|-----------------------|--------|-----------|----------|
| 6X       | 1         | 30           | 6                     | 0.002  | 0.200     | 0.004    |
| 6X       | 2         | 28           | 5                     | 0.002  | 0.179     | 0.003    |
| 6X       | 3         | 32           | 7                     | 0.002  | 0.219     | 0.005    |
| 6X       | 4         | 31           | 6                     | 0.002  | 0.194     | 0.004    |
| 6X       | 5         | 29           | 4                     | 0.001  | 0.138     | 0.003    |
| 10X      | 1         | 60           | 16                    | 0.005  | 0.267     | 0.011    |
| 10X      | 2         | 48           | 13                    | 0.004  | 0.271     | 0.009    |
| 10X      | 3         | 56           | 9                     | 0.003  | 0.161     | 0.006    |
| 10X      | 4         | 58           | 13                    | 0.004  | 0.224     | 0.009    |
| 10X      | 5         | 58           | 15                    | 0.005  | 0.259     | 0.010    |
| 15X      | 1         | 91           | 20                    | 0.007  | 0.220     | 0.013    |
| 15X      | 2         | 91           | 23                    | 0.008  | 0.253     | 0.015    |
| 15X      | 3         | 92           | 25                    | 0.009  | 0.272     | 0.017    |
| 15X      | 4         | 87           | 26                    | 0.009  | 0.299     | 0.017    |
| 15X      | 5         | 89           | 24                    | 0.008  | 0.270     | 0.016    |

Table S17. Performance of BWA/Sniffles on HX1 genome (Deletion calls)

| Coverage | Replicate | No. of calls | No. of true positives | Recall | Precision | F1 score |
|----------|-----------|--------------|-----------------------|--------|-----------|----------|
| 6X       | 1         | 1668         | 1295                  | 0.543  | 0.776     | 0.639    |
| 6X       | 2         | 1717         | 1323                  | 0.554  | 0.771     | 0.645    |
| 6X       | 3         | 1698         | 1316                  | 0.551  | 0.775     | 0.644    |
| 6X       | 4         | 1725         | 1328                  | 0.556  | 0.770     | 0.646    |
| 6X       | 5         | 1714         | 1314                  | 0.550  | 0.767     | 0.641    |
| 10X      | 1         | 2223         | 1558                  | 0.653  | 0.701     | 0.676    |
| 10X      | 2         | 2233         | 1575                  | 0.660  | 0.705     | 0.682    |
| 10X      | 3         | 2220         | 1559                  | 0.653  | 0.702     | 0.677    |
| 10X      | 4         | 2254         | 1571                  | 0.658  | 0.697     | 0.677    |
| 10X      | 5         | 2228         | 1563                  | 0.655  | 0.702     | 0.677    |
| 15X      | 1         | 2774         | 1696                  | 0.711  | 0.611     | 0.657    |
| 15X      | 2         | 2713         | 1718                  | 0.720  | 0.633     | 0.674    |
| 15X      | 3         | 2702         | 1680                  | 0.704  | 0.622     | 0.660    |
| 15X      | 4         | 2721         | 1686                  | 0.706  | 0.620     | 0.660    |
| 15X      | 5         | 2702         | 1679                  | 0.703  | 0.621     | 0.660    |

Table S18. Performance of BWA/Sniffles on HX1 genome (Insertion calls)

| Coverage | Replicate | No. of calls | No. of true positives | Recall | Precision | F1 score |
|----------|-----------|--------------|-----------------------|--------|-----------|----------|
| 6X       | 1         | 4019         | 400                   | 0.136  | 0.100     | 0.115    |
| 6X       | 2         | 4131         | 422                   | 0.144  | 0.102     | 0.119    |
| 6X       | 3         | 4073         | 403                   | 0.137  | 0.099     | 0.115    |
| 6X       | 4         | 4061         | 423                   | 0.144  | 0.104     | 0.121    |
| 6X       | 5         | 4088         | 409                   | 0.139  | 0.100     | 0.116    |
| 10X      | 1         | 10228        | 598                   | 0.204  | 0.058     | 0.091    |
| 10X      | 2         | 10260        | 626                   | 0.213  | 0.061     | 0.095    |
| 10X      | 3         | 10338        | 594                   | 0.202  | 0.057     | 0.089    |
| 10X      | 4         | 10170        | 609                   | 0.207  | 0.060     | 0.093    |
| 10X      | 5         | 10184        | 605                   | 0.206  | 0.059     | 0.092    |
| 15X      | 1         | 21426        | 764                   | 0.260  | 0.036     | 0.063    |
| 15X      | 2         | 21532        | 736                   | 0.251  | 0.034     | 0.060    |
| 15X      | 3         | 21582        | 775                   | 0.264  | 0.036     | 0.063    |
| 15X      | 4         | 21578        | 770                   | 0.262  | 0.036     | 0.063    |
| 15X      | 5         | 21428        | 775                   | 0.264  | 0.036     | 0.064    |

Table S19. Performance of NGMLR/Sniffles on HX1 genome (Deletion calls)

| Coverage | Replicate | No. of calls | No. of true positives | Recall | Precision | F1 score |
|----------|-----------|--------------|-----------------------|--------|-----------|----------|
| 6X       | 1         | 2731         | 1885                  | 0.790  | 0.690     | 0.737    |
| 6X       | 2         | 2785         | 1927                  | 0.807  | 0.692     | 0.745    |
| 6X       | 3         | 2754         | 1889                  | 0.791  | 0.686     | 0.735    |
| 6X       | 4         | 2796         | 1920                  | 0.804  | 0.687     | 0.741    |
| 6X       | 5         | 2767         | 1907                  | 0.799  | 0.689     | 0.740    |
| 10X      | 1         | 3452         | 2178                  | 0.912  | 0.631     | 0.746    |
| 10X      | 2         | 3470         | 2184                  | 0.915  | 0.629     | 0.746    |
| 10X      | 3         | 3470         | 2185                  | 0.915  | 0.630     | 0.746    |
| 10X      | 4         | 3493         | 2187                  | 0.916  | 0.626     | 0.744    |
| 10X      | 5         | 3490         | 2203                  | 0.923  | 0.631     | 0.750    |
| 15X      | 1         | 4009         | 2293                  | 0.961  | 0.572     | 0.717    |
| 15X      | 2         | 3989         | 2290                  | 0.959  | 0.574     | 0.718    |
| 15X      | 3         | 3970         | 2289                  | 0.959  | 0.577     | 0.720    |
| 15X      | 4         | 3973         | 2286                  | 0.958  | 0.575     | 0.719    |
| 15X      | 5         | 3954         | 2281                  | 0.956  | 0.577     | 0.719    |

Table S20. Performance of NGMLR/Sniffles on HX1 genome (Insertion calls)

| Coverage | Replicate | No. of calls | No. of true positives | Recall | Precision | F1 score |
|----------|-----------|--------------|-----------------------|--------|-----------|----------|
| 6X       | 1         | 4694         | 1674                  | 0.570  | 0.357     | 0.439    |
| 6X       | 2         | 4724         | 1666                  | 0.567  | 0.353     | 0.435    |
| 6X       | 3         | 4664         | 1677                  | 0.571  | 0.360     | 0.441    |
| 6X       | 4         | 4733         | 1688                  | 0.575  | 0.357     | 0.440    |
| 6X       | 5         | 4752         | 1670                  | 0.569  | 0.351     | 0.434    |
| 10X      | 1         | 8508         | 2013                  | 0.685  | 0.237     | 0.352    |
| 10X      | 2         | 8813         | 2002                  | 0.682  | 0.227     | 0.341    |
| 10X      | 3         | 8593         | 2025                  | 0.689  | 0.236     | 0.351    |
| 10X      | 4         | 8690         | 2010                  | 0.684  | 0.231     | 0.346    |
| 10X      | 5         | 8789         | 2011                  | 0.685  | 0.229     | 0.343    |
| 15X      | 1         | 14434        | 2167                  | 0.738  | 0.150     | 0.249    |
| 15X      | 2         | 14404        | 2182                  | 0.743  | 0.151     | 0.252    |
| 15X      | 3         | 14617        | 2183                  | 0.743  | 0.149     | 0.249    |
| 15X      | 4         | 14665        | 2181                  | 0.743  | 0.149     | 0.248    |
| 15X      | 5         | 14561        | 2168                  | 0.738  | 0.149     | 0.248    |



Table S21. Performance of NextSV sensitive call set on HX1 genome (Deletion calls)

| Coverage | Replicate | No. of calls | No. of true positives | Recall | Precision | F1 score |
|----------|-----------|--------------|-----------------------|--------|-----------|----------|
| 6X       | 1         | 3967         | 2029                  | 0.850  | 0.511     | 0.639    |
| 6X       | 2         | 4036         | 2070                  | 0.867  | 0.513     | 0.645    |
| 6X       | 3         | 3990         | 2036                  | 0.853  | 0.510     | 0.639    |
| 6X       | 4         | 4051         | 2056                  | 0.861  | 0.508     | 0.639    |
| 6X       | 5         | 4005         | 2068                  | 0.866  | 0.516     | 0.647    |
| 10X      | 1         | 5135         | 2276                  | 0.953  | 0.443     | 0.605    |
| 10X      | 2         | 5134         | 2274                  | 0.953  | 0.443     | 0.605    |
| 10X      | 3         | 5127         | 2275                  | 0.953  | 0.444     | 0.606    |
| 10X      | 4         | 5115         | 2277                  | 0.954  | 0.445     | 0.607    |
| 10X      | 5         | 5193         | 2294                  | 0.961  | 0.442     | 0.605    |
| 15X      | 1         | 6083         | 2355                  | 0.987  | 0.387     | 0.556    |
| 15X      | 2         | 6003         | 2364                  | 0.990  | 0.394     | 0.564    |
| 15X      | 3         | 6004         | 2362                  | 0.990  | 0.393     | 0.563    |
| 15X      | 4         | 6024         | 2357                  | 0.987  | 0.391     | 0.560    |
| 15X      | 5         | 6000         | 2358                  | 0.988  | 0.393     | 0.562    |

Table S22. Performance of NextSV sensitive call set on HX1 genome (Insertion calls)

| Coverage | Replicate | No. of calls | No. of true positives | Recall | Precision | F1 score |
|----------|-----------|--------------|-----------------------|--------|-----------|----------|
| 6X       | 1         | 7422         | 2313                  | 0.788  | 0.312     | 0.447    |
| 6X       | 2         | 7379         | 2332                  | 0.794  | 0.316     | 0.452    |
| 6X       | 3         | 7388         | 2327                  | 0.792  | 0.315     | 0.451    |
| 6X       | 4         | 7384         | 2313                  | 0.788  | 0.313     | 0.448    |
| 6X       | 5         | 7426         | 2292                  | 0.780  | 0.309     | 0.442    |
| 10X      | 1         | 11831        | 2654                  | 0.904  | 0.224     | 0.359    |
| 10X      | 2         | 12151        | 2649                  | 0.902  | 0.218     | 0.351    |
| 10X      | 3         | 11874        | 2650                  | 0.902  | 0.223     | 0.358    |
| 10X      | 4         | 12046        | 2654                  | 0.904  | 0.220     | 0.354    |
| 10X      | 5         | 12121        | 2654                  | 0.904  | 0.219     | 0.353    |
| 15X      | 1         | 17841        | 2753                  | 0.937  | 0.154     | 0.265    |
| 15X      | 2         | 17760        | 2769                  | 0.943  | 0.156     | 0.268    |
| 15X      | 3         | 17926        | 2757                  | 0.939  | 0.154     | 0.264    |
| 15X      | 4         | 17994        | 2735                  | 0.931  | 0.152     | 0.261    |
| 15X      | 5         | 17995        | 2748                  | 0.936  | 0.153     | 0.263    |

Table S23. Performance of NextSV stringent call set on HX1 genome (Deletion calls)

| Coverage | Replicate | No. of calls | No. of true positives | Recall | Precision | F1 score |
|----------|-----------|--------------|-----------------------|--------|-----------|----------|
| 6X       | 1         | 2005         | 1640                  | 0.687  | 0.818     | 0.747    |
| 6X       | 2         | 2050         | 1664                  | 0.697  | 0.812     | 0.750    |
| 6X       | 3         | 2007         | 1627                  | 0.682  | 0.811     | 0.741    |
| 6X       | 4         | 2039         | 1646                  | 0.690  | 0.807     | 0.744    |
| 6X       | 5         | 2027         | 1628                  | 0.682  | 0.803     | 0.738    |
| 10X      | 1         | 2486         | 1930                  | 0.809  | 0.776     | 0.792    |
| 10X      | 2         | 2477         | 1916                  | 0.803  | 0.774     | 0.788    |
| 10X      | 3         | 2462         | 1918                  | 0.804  | 0.779     | 0.791    |
| 10X      | 4         | 2503         | 1921                  | 0.805  | 0.767     | 0.786    |
| 10X      | 5         | 2504         | 1924                  | 0.806  | 0.768     | 0.787    |
| 15X      | 1         | 2651         | 1997                  | 0.837  | 0.753     | 0.793    |
| 15X      | 2         | 2681         | 2016                  | 0.845  | 0.752     | 0.796    |
| 15X      | 3         | 2681         | 2022                  | 0.847  | 0.754     | 0.798    |
| 15X      | 4         | 2665         | 2002                  | 0.839  | 0.751     | 0.793    |
| 15X      | 5         | 2646         | 2003                  | 0.839  | 0.757     | 0.796    |

Table S24. Performance of NextSV stringent call set on HX1 genome (Insertion calls)

| Coverage | Replicate | No. of calls | No. of true positives | Recall | Precision | F1 score |
|----------|-----------|--------------|-----------------------|--------|-----------|----------|
| 6X       | 1         | 2166         | 1456                  | 0.496  | 0.672     | 0.571    |
| 6X       | 2         | 2144         | 1477                  | 0.503  | 0.689     | 0.581    |
| 6X       | 3         | 2149         | 1483                  | 0.505  | 0.690     | 0.583    |
| 6X       | 4         | 2119         | 1485                  | 0.506  | 0.701     | 0.587    |
| 6X       | 5         | 2159         | 1456                  | 0.496  | 0.674     | 0.571    |
| 10X      | 1         | 2714         | 1753                  | 0.597  | 0.646     | 0.620    |
| 10X      | 2         | 2721         | 1766                  | 0.601  | 0.649     | 0.624    |
| 10X      | 3         | 2733         | 1777                  | 0.605  | 0.650     | 0.627    |
| 10X      | 4         | 2692         | 1760                  | 0.599  | 0.654     | 0.625    |
| 10X      | 5         | 2703         | 1751                  | 0.596  | 0.648     | 0.621    |
| 15X      | 1         | 2899         | 1846                  | 0.629  | 0.637     | 0.633    |
| 15X      | 2         | 2937         | 1840                  | 0.626  | 0.626     | 0.626    |
| 15X      | 3         | 2970         | 1853                  | 0.631  | 0.624     | 0.627    |
| 15X      | 4         | 2943         | 1858                  | 0.633  | 0.631     | 0.632    |
| 15X      | 5         | 2933         | 1833                  | 0.624  | 0.625     | 0.625    |
